# Supplementary material
Source: HighWire-hosted journal article supplement (http://ajnr-stage2.highwire.org/highwire/filestream/52823/field_highwire_adjunct_files/0/15-00916.pdf)
Supplement: 15-00916.pdf [file 15-00916.pdf]

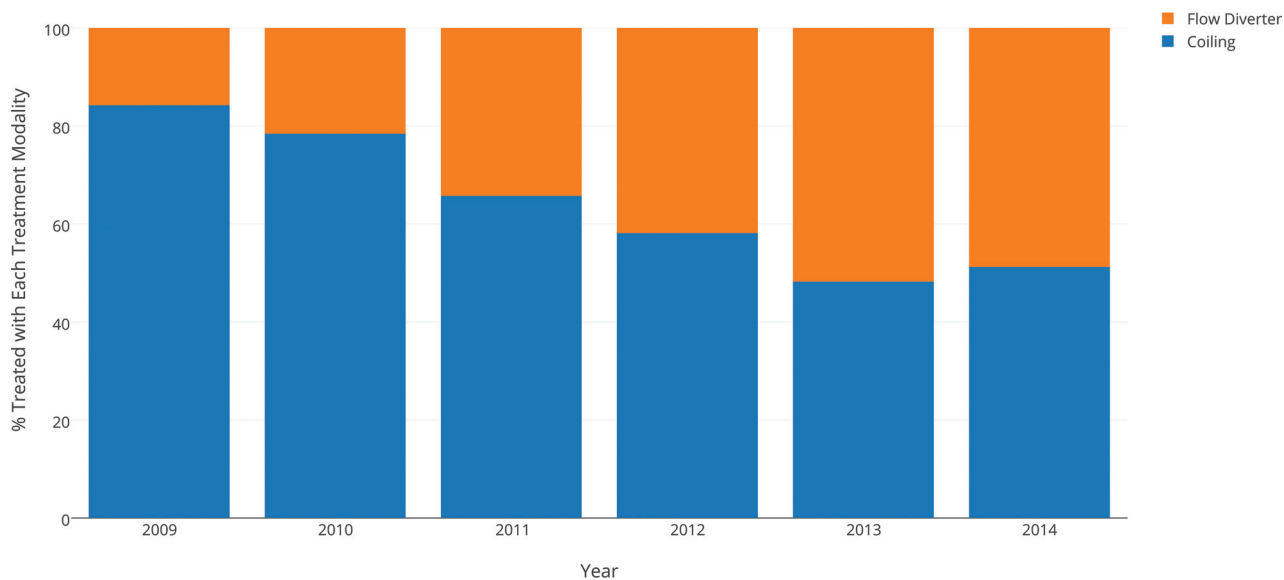

**ON-LINE FIG 1.** Trends in the use of flow diversion and coiling for unruptured aneurysms from 2009 to 2014.

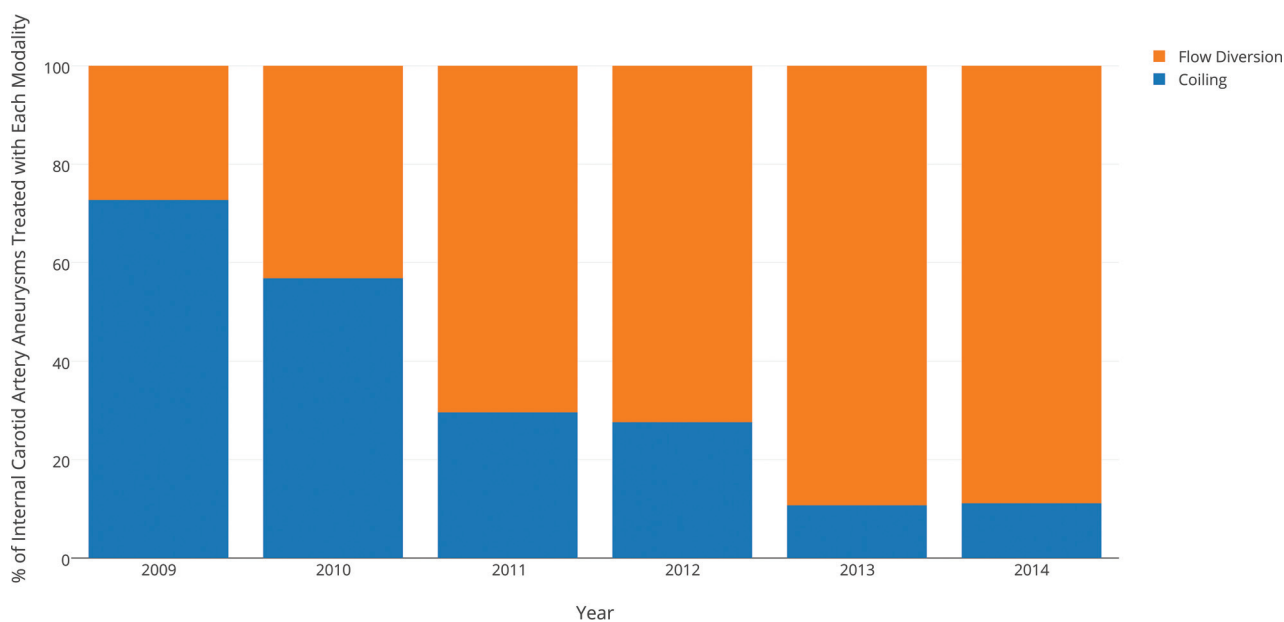

**ON-LINE FIG 2.** Trends in use of flow diversion and coiling for internal carotid artery unruptured aneurysms from 2009 to 2014.

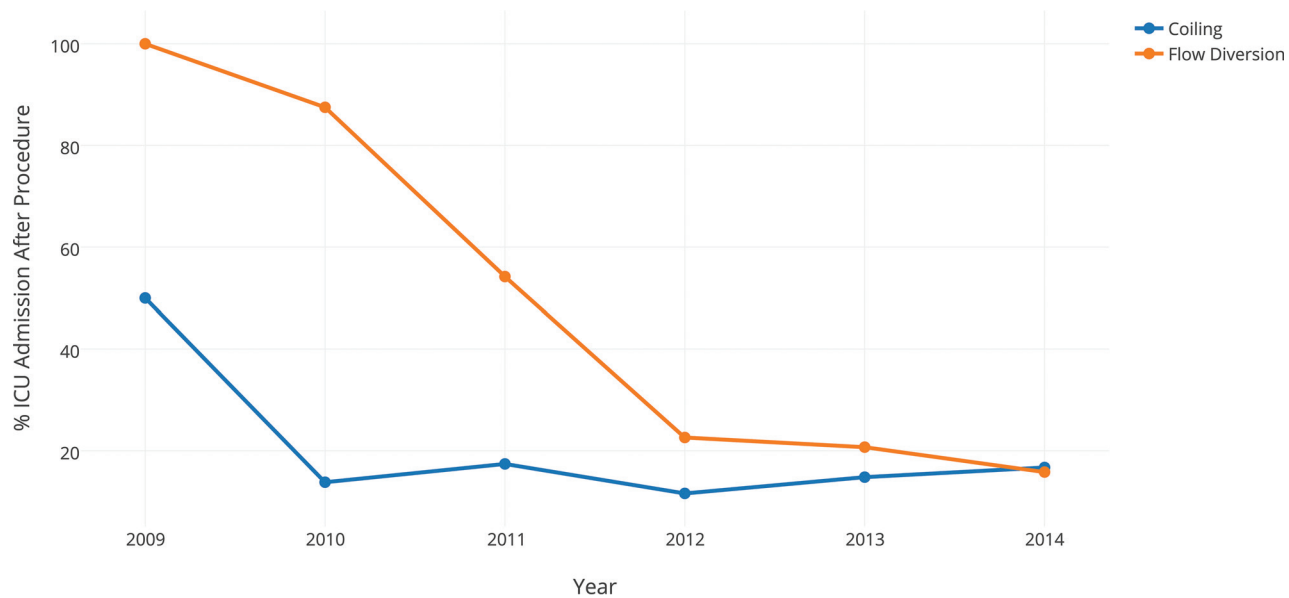

**ON-LINE FIG 3.** Trends in ICU admission rates for flow diversion and coiling of unruptured aneurysms from 2009 to 2014.
